# Supplementary material
Source: publisher site journal article supplement (https://www.dovepress.com/article/485084)
Supplement: Supplementary file 1 [file get_supplementary_file.php]

**Supplemental Material**

**Polyoxometalates ameliorate metabolic dysfunction-associated steatotic liver disease by activating the AMPK signaling pathway**

Dandan Wang1,2,3†, Jingguo Wang3†, Zequn Yin4, Ke Gong3,Shuang Zhang3, Zhengbao Zha3* and Yajun Duan4*

1School of Pharmacy, Anhui University of Chinese Medicine, Hefei, Anhui 230011, China;

2State Key Laboratory of Functions and Applications of Medicinal Plants, Guizhou Medical University, Guiyang 550014, China;

3College of Food and Biological Engineering, Hefei University of Technology, Hefei, Anhui 230601, China;

4Department of Cardiology, The First Affiliated Hospital of USTC, Division of Life Sciences and Medicine, University of Science and Technology of China, Hefei, Anhui 230031, China

†Dandan Wang and Jingguo Wang contributed equally to this work.

*Correspondence author:

Zhengbao Zha

zbzha@hfut.edu.cn

College of Food and Biological Engineering, Hefei University of Technology, No.420 Feicui Road, Hefei, Anhui, 230601, China

Yajun Duan

[yajunduan@ustc.edu.cn](mailto:yajunduan@ustc.edu.cn)

Department of Cardiology, The First Affiliated Hospital of USTC, Division of Life Sciences and Medicine, University of Science and Technology of China, No.96 Jinzhai Road, Hefei, Anhui, 230031, China

**Supplemental experimental**

**Characterization of POM.** The morphology of the POM were obtained on JEM 1400 Flash. XPS and FTIR were performed by an ESCALAB250Xi (Thermo Scientific), respectively. The diameter distribution and UV-vis-NIR spectra were performed by Zetasizer Nano series and U-5100 (Hitachi Co.), respectively. Quantitative analysis of the W element content in the POM was measured by inductively coupled plasma-atomic emission spectrometry (ICP-AES, AtomscanAdvantage).

**Pharmacokinetics and biodistribution *in vivo*.** To investigate the pharmacokinetics and biodistribution of POM, mice were tail vein injection with POM (n = 3). The blood at 0, 1, 2, 4, 8, and 12 h were collected, and the main organs (heart, liver, spleen, lung and kidney) at 0, 2, 4, 8, 24 and 48 h were collected. Subsequently, the above blood and main organs were nitrated by aqua regia. ICP-AES analysis was performed to accurately determine the content of W.

**Supplementary Table 1.** **Sequences of primers for qRT-PCR**

| **Gene** | **Forward** | **Backward** |
| --- | --- | --- |
| h-FASN | AACTCCAAGGACACAGTCACCAT | CAGCTGCTCCACGAACTCAAA |
| m-FASN | TTGCTGGCACTACAGAATGC | AACAGCCTCAGAGCGACAAT |
| m-LXR | GGATAGGGTTGGAGTCAGCA | GCTCAGCACGTTGTAATGGA |
| m-ACC1 | GAAGTCAGAGCCACGGCACA | GGCAATCTCAGTTCAAGCCAG |
| h-SREBP1c | GGATTGCACTTTCGAAGACATG | AGCATAGGGTGGGTCAAATAGG |
| m-SREBP1c | GCGCCATGGACGAGCTG | TTGGCACCTGGGCTGCT |
| h-SCD1 | CCCAGCTGTCAAAGAGAAGG | CAAGAAAGTGGCAACGAACA |
| m-SCD1 | TGGGTTGGCTGCTTGTG | GCGTGGGCAGGATGAAG |
| h-SIRT1 | TCAGTGGCTGGAACAGTGAG | TCTGGCATGTCCCACTATCA |
| m--SMA | ACTGGGACGACATGGAAAAG | GTTCAGTGGTGCCTCTGTCA |
| m-Col1a1 | GACGCCATCAAGGTCTACTG | ACGGGAATCCATCGGTCA |
| h-PPAR | ATGGCATCCAGAACAAGGAG | GGCGAATATGGCCTCATAAA |
| h-PGC-1 | CACCAGCCAACACTCAGCTA | GTGTGAGGAGGGTCATCGTT |
| m-CPT-1 | AGGACCCTGAGGCATCTATT | ATGACCTCCTGGCATTCTCC |
| m-ACOX1 | GTCTCCGTCATGAATCCCGA | TGCGATGCCAAATTCCCTCA |
| m-TNF | CGTCGTAGCAAACCACCAAG | TTGAAGAGAACCTGGGAGTAGACA |
| m-IL-6 | GAGGATACCACTCCCAACAGACC | AAGTGCATCATCGTTGTTCATACA |
| m-IL-1 | GACCTTCCAGGATGAGGACA | AGCTCATATGGGTCCGACAG |
| m-SOD1 | GCCTTGTGTATTGTCCCCAT | ACCATCCACTTCGAGCAGAA |
| m-SOD2 | AGACACGGCTGTCAGCTTCT | CTGGACAAACCTGAGCCCTA |
| h-GAPDH | GGTGGTCTCCTCTGACTTCAACA | GTTGCTGTAGCCAAATTCGTTGT |
| m-GAPDH | ACCCAGAAGACTGTGGATGG | ACACATTGGGGGTAGGAACA |

m: mus musculus; h: homo sapiens

**Supplementary Table 2. Analysis of band density for Western blots in Fig. 3d and 3e.**

| **Genes** | **Normal** | **Normal+POM** | **HFD** | **HFD+POM** |
| --- | --- | --- | --- | --- |
| FASN | 1.0±0.26 | 1.27±0.29 | 8.29±2.22** | 2.29±1.28# |
| ACC1 | 1.0±0.26 | 0.95±0.24 | 5.18±1.42** | 2.54±0.63# |
| SCD1 | 1.0±0.1 | 0.82±0.11 | 1.61±0.23* | 0.94±0.13# |
| SREBP1c | 1.0±0.17 | 1.15±0.18 | 5.09±0.82** | 1.32±0.14## |
| LXR | 1.0±0.2 | 0.9±0.15 | 2.08±0.4* | 1.25±0.26# |
| LXR | 1.0±0.16 | 0.99±0.2 | 0.83±0.12 | 0.82±0.08 |

*, *P*<0.05; **, *P*<0.01 versus control (*n* = 3). #, *P*<0.05; ##, *P*<0.01 versus HFD group (*n* = 3).

**Supplementary Table 3. Analysis of band density for Western blots in Fig. 4b and 4d.**

| **Genes** | **Normal** | **Normal+POM** | **HFD** | **HFD+POM** |
| --- | --- | --- | --- | --- |
| (p)SREBP2 | 1.0±0.07 | 1.06±0.17 | 1.61±0.31* | 0.9±0.18# |
| (m)SREBP2 | 1.0±0.32 | 1.31±0.2 | 2.65±0.43** | 1.63±0.47# |
| p-AMPK | 1.0±0.29 | 0.94±0.11 | 0.32±0.02* | 0.97±0.26# |

*, *P*<0.05; **, *P*<0.01 versus control (*n* = 3). #, *P*<0.05 versus HFD group (*n* = 3).

**Supplementary Table 4. Analysis of band density for Western blots in Fig. 4f and 4h.**

| **Lane** | **1** | **2** | **3** | **4** | **5** | **6** |
| --- | --- | --- | --- | --- | --- | --- |
| **Genes** |  |  |  |  |  |  |
| p-AMPK | 1.0±0.03 | 0.64±0.11* | 0.94±0.06# | 0.17±0.08 | 0.11±0.01 | 0.13±0.02ns |
| FASN | 1.0±0.03 | 3.16±0.39** | 1.67±0.25## | 4.63±0.28 | 5.49±0.58 | 4.6±0.16 ns |
| SCD1 | 1.0±0.11 | 3.03±0.07** | 1.78±0.02## | 4.59±0.1 | 7.3±0.12 | 6.79±0.35 ns |

*, *P*<0.05; **, *P*<0.01 versus Lane 1 (*n* = 3). #, *P*<0.05; ##, *P*<0.01 versus Lane 2 (*n* = 3). ns, not significant versus Lane 5

**Supplementary Table 5. Analysis of band density for Western blots in Fig. 5c, Fig. 6d and Fig. 6f.**

| **Genes** | **Normal** | **Normal+POM** | **MCD** | **MCD+POM** |
| --- | --- | --- | --- | --- |
| Col1a1 | 1.0±0.34 | 1.2±0.42 | 3.24±1.12* | 0.91±0.53# |
| -SMA | 1.0±0.29 | 0.87±0.26 | 2.8±0.77* | 1.08±0.15# |
| SIRT1 | 1.0±0.29 | 1.11±0.16 | 0.44±0.04* | 1.43±0.41# |
| PPAR | 1.0±0.28 | 0.87±0.32 | 0.22±0.07** | 0.48±0.14# |
| PGC-1 | 1.0±0.32 | 0.81±0.16 | 0.32±0.07* | 0.85±0.13## |
| p-AMPK | 1.0±0.05 | 0.94±0.27 | 0.29±0.16** | 0.65±0.08# |
| TNF | 1.0±0.08 | 1.15±0.18 | 2.56±0.76* | 0.87±0.24# |
| IL-1 | 1.0±0.14 | 1.22±0.24 | 2.29±0.17** | 1.26±0.35## |
| p-NF-B | 1.0±0.06 | 1.19±0.16 | 2.07±0.46* | 0.77±0.29# |

*, *P*<0.05; **, *P*<0.01 versus control (*n* = 3). #, *P*<0.05; ##, *P*<0.01 versus MCD group (*n* = 3).

**Supplementary Table 6. Analysis of band density for Western blots in Fig. 7d and 7e.**

| **Genes** | **Normal** | **Normal+POM** | **MCD** | **MCD+POM** |
| --- | --- | --- | --- | --- |
| FoxO3a | 1.0±0.15 | 1.04±0.14 | 0.36±0.18** | 0.73±0.13# |
| SOD1 | 1.0±0.19 | 0.9±0.19 | 0.21±0.04** | 0.67±0.26# |
| SOD2 | 1.0±0.21 | 0.84±0.1 | 0.48±0.03* | 0.59±0.05# |
| Bcl-2 | 1.0±0.24 | 1.13±0.25 | 0.49±0.01* | 0.98±0.21# |
| Bax | 1.0±0.07 | 1.08±0.23 | 3.7±0.47** | 2.38±0.64# |
| Cl-Caspase3 | 1.0±0.1 | 0.97±0.2 | 2.13±0.25** | 1.66±0.14# |

*, *P*<0.05; **, *P*<0.01 versus control (*n* = 3). #, *P*<0.05 versus MCD group (*n* = 3).

**Supplementary Table 7. Analysis of band density for Western blots in Supplementary Fig. S3.**

| **Lane** | **1** | **2** | **3** | **4** | **5** |
| --- | --- | --- | --- | --- | --- |
| **Genes** |  |  |  |  |  |
| FASN | 1.0±0.07 | 2.65±0.29** | 1.8±0.13# | 1.09±0.1## | 0.67±0.03## |
| SCD1 | 1.0±0.08 | 2.32±0.1** | 1.79±0.36# | 1.32±0.2## | 1.04±0.13## |
| (p)SREBP2 | 1.0±0.11 | 2.23±0.21** | 1.83±0.2 | 1.6±0.18# | 0.65±0.04## |
| (m)SREBP2 | 1.0±0.12 | 3.39±0.09** | 2.97±0.51 | 1.83±0.23## | 1.67±0.24## |
| LXR | 1.0±0.13 | 4.1±0.3** | 3.22±0.3# | 1.58±0.23# | 0.85±0.1## |
| LXR | 1.0±0.07 | 1.1±0.03 | 1.18±0.01 | 0.97±0.09 | 1.08±0.07 |

**, *P*<0.01 versus Lane 1 (*n* = 3). #, *P*<0.05; ##, *P*<0.01 versus Lane 2 (*n* = 3).

**Supplementary Table 8. Analysis of band density for Western blots in Supplementary Fig. S4.**

| **Lane** | **1** | **2** | **3** | **4** | **5** |
| --- | --- | --- | --- | --- | --- |
| **Genes** |  |  |  |  |  |
| SIRT1 | 1.0±0.19 | 0.88±0.09 | 1.07±0.18 | 1.54±0.25# | 1.19±0.07# |
| PGC-1 | 1.0±0.12 | 0.7±0.02* | 0.74±0.12 | 0.91±0.12# | 0.97±0.09## |
| PPAR | 1.0±0.09 | 0.45±0.09** | 0.47±0.06 | 1.34±0.19## | 1.5±0.14## |
| CPT-1 | 1.0±0.1 | 0.33±0.03** | 0.52±0.11# | 0.67±0.13# | 0.8±0.06## |

*, *P*<0.05; **, *P*<0.01 versus Lane 1 (*n* = 3). #, *P*<0.05; ##, *P*<0.01 versus Lane 2 (*n* = 3).

**Supplementary Figure Legends**


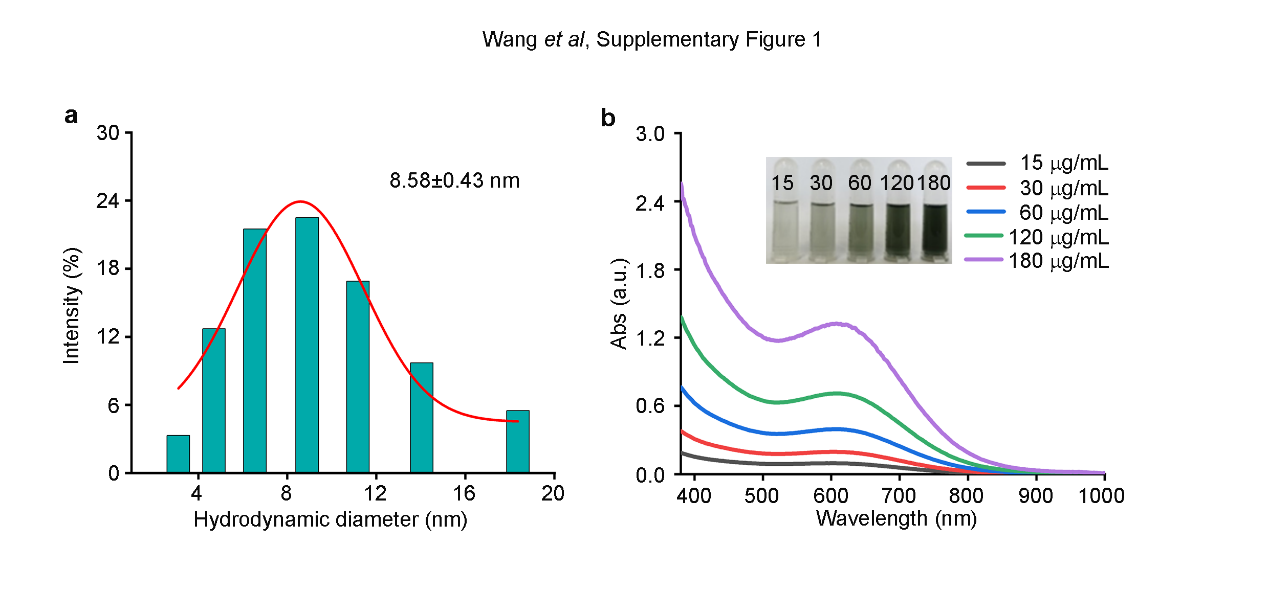


**Fig. S1.** (a) Hydrodynamic size distribution of POM. (b) UV-vis-NIR spectra digital photographs of POM with different concentrations.

**
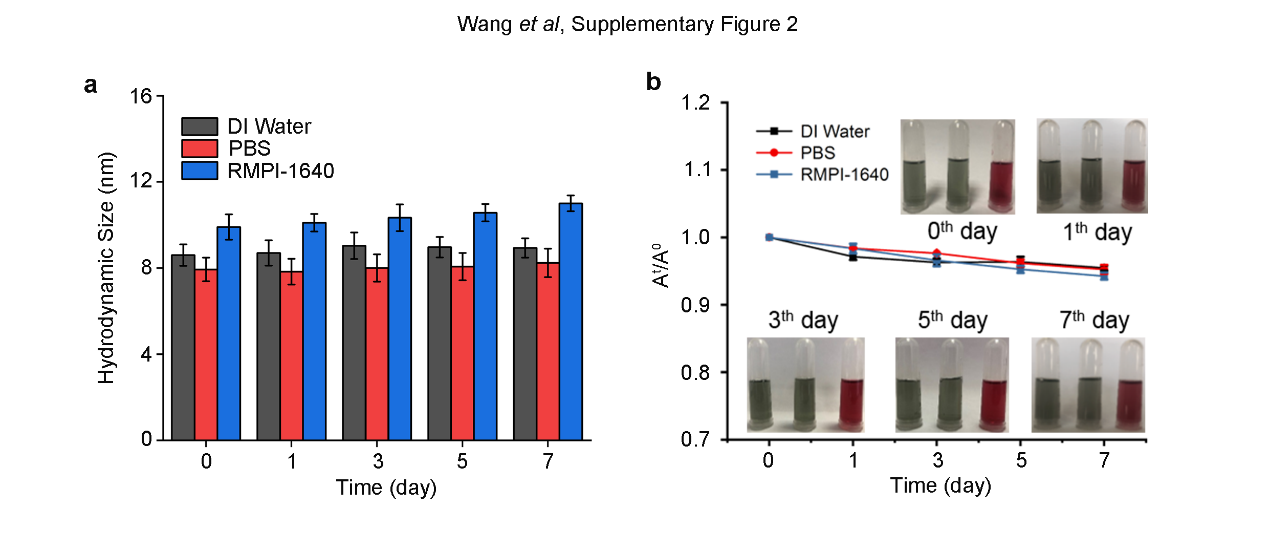
**

**Fig. S2.** Stability analysis of the POM measured by (a) DLS and (b) UV-vis-NIR spectra in different aqueous media (DI-water, PBS and RMPI-1640) during 7-day period.


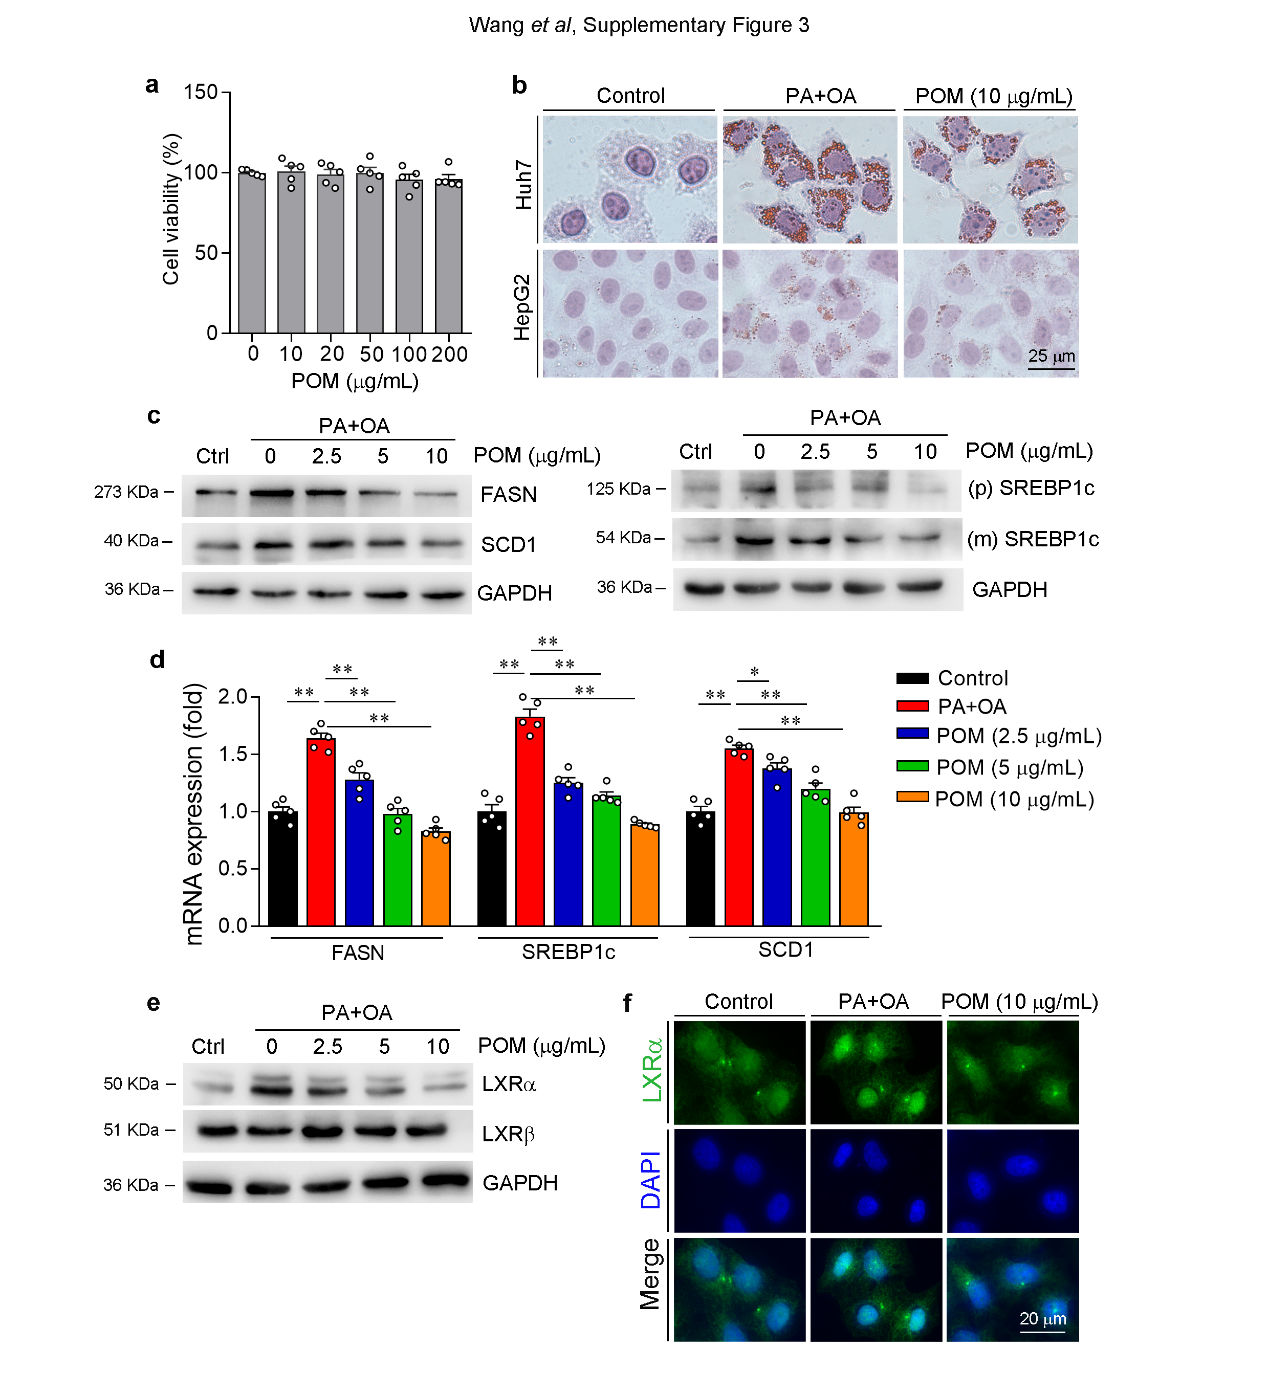


**Fig. S3.** Protective effects of POM on palmitic acid/oleic acid (PA/OA) in induced lipid accumulation in hepatic cell. PA/OA stimulated cells and treated with POM at the indicated concentrations for 24 h. (a) Cytotoxicity of POM in HepG2 cells. (b) Oil Red O staining in HepG2 and Huh7 cells. (c, d) Expression of FASN, SCD1 and SREBP1c [proprotein (p) and mature (m) form of SREBP1c] determined by western blotting and qRT-PCR, respectively. (e, f) Expression of LXR and LXR determined by western blot and immunoflu­orescence staining, respectively. *, *P*<0.05; **, *P*<0.01; versus corresponding control (*n* = 5).

**
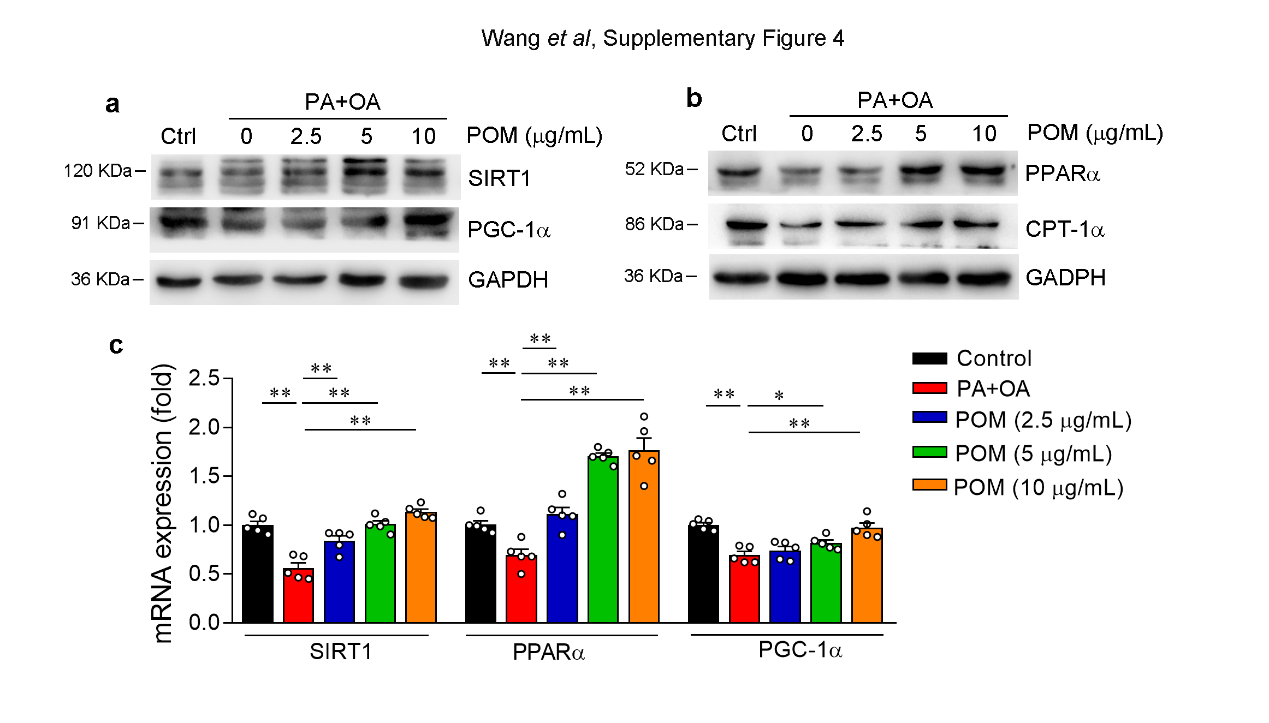
**

**Fig. S4.** POM activate the SIRT1 pathway to promote lipid oxidation. PA/OA stimulated HepG2 cells and treated with POM at the indicated concentrations for 24 h. (a, b) Expression of SIRT1, PGC-1, PPAR and CPT-1 determined by western blotting; (c) mRNA expression of SIRT1, PPAR and PGC-1 determined by qRT-PCR. *, *P*<0.05; **, *P*<0.01; versus corresponding control (*n* = 5).
